# Supplementary material for: Assembly and disassembly of a Zn10 high-nuclearity circular helicate
Source: Royal Society of Chemistry journal article supplement (doi:10.1039/c2cc30381g), 2012-01-01
Supplement: c2cc30381g.pdf [file c2cc30381g.pdf]

## Assembly and Disassembly of a Zn<sub>10</sub> High-Nuclearity Circular Helicate

Zih-Syuan Wu, Jui-Ting Hsu, Chang-Chih Hsieh and Yih-Chern Horng\*

Department of Chemistry, National Changhua University of Education, 1 Jin-De Road, Changhua 50058,  
Taiwan

### Electronic Supporting Information

#### Materials and Methods

**General.** All reactions were performed under a dry nitrogen atmosphere according to standard Schlenk techniques or performed in a glove-box. All solvent used were distilled under nitrogen following standard procedures, and then stored in dried N<sub>2</sub>-filled reservoirs which contained 4 Å molecular sieves. Commercially available chemicals were purchased from Aldrich or Acros, and used as received. <sup>1</sup>H, <sup>13</sup>C, <sup>1</sup>H-<sup>1</sup>H COSY and <sup>1</sup>H-<sup>13</sup>C HSQC NMR spectra were collected on a Avance 300 spectrometer. Chemical shifts for <sup>1</sup>H and <sup>13</sup>C{<sup>1</sup>H} spectra were recorded in ppm relative to the residual proton and <sup>13</sup>C of CDCl<sub>3</sub> (<sup>1</sup>H: δ 7.24; <sup>13</sup>C: δ 77.0). The crystals suitable for structure analysis were mounted on a glass fiber with silicone grease and placed in the cold stream of a Bruker APEX II or a Bruker AXS SMART-1000 diffractometer with graphite monochromated Mo K<sub>α</sub> radiation (λ = 0.71073Å). All structures were solved by direct methods using SHELXS-97 and refined by full-matrix least squares methods against F<sup>2</sup> with SHELXL-97.<sup>1</sup> Tables of neutral atom scattering factors, *f'* and *f''*, and absorption coefficients are from a standard source.<sup>2</sup> All atoms except hydrogen atoms were refined with anisotropic displacement parameters. In general, hydrogen atoms were fixed at calculated positions, and their positions were refined by a riding model. The crystal structure of (ZnL)<sub>10</sub> contains heavily disordered solvent molecules in the cavity and void spaces. These disordered solvent molecules were not further identified or refined. Instead, a new set of F<sup>2</sup> (hkl) values with the contribution from solvent molecules withdrawn was obtained by the SQUEEZE procedure implemented in PLATON program.<sup>3</sup> Fluorescence spectra were recorded on a Cary Eclipse Fluorescence spectrophotometer. Elemental analyses and high-resolution MS (HRMS) were performed on a Heraeus CHN-OS Rapid Elemental Analyzer and a HRMS spectrometer (Finnigan/Thermo Quest MAT 95XL), respectively, at the Instruments Center of National Chung Hsing University, Taiwan.

#### Synthesis of H<sub>2</sub>L

A mixture of 2,4-bis(bromomethyl)-1,3,5-triethylbenzene (0.7 g, 1.9 mmol), 2,2'-aminophenyl disulfide (0.8 g, 3.3 mmol), K<sub>2</sub>CO<sub>3</sub> (1.0 g, 7.2 mmol), and acetonitrile (50 ml), placed in a 100 ml flask, was refluxed at 85°C for 72 hrs. After cooled down to RT, the yellow precipitates were filtered and washed with CH<sub>3</sub>CN (about 100 ml) to remove excess 2,2'-aminophenyl disulfide. The yellow residues were extracted with dichloromethane and distilled water. The combined dichloromethane portions were dried over anhydrous MgSO<sub>4</sub>, filtered, and vacuum dried to afford a yellow solid. An open 50 ml flask, containing the yellow solid and excess of NaBH<sub>4</sub> (0.15 g, 4.0 mmol), was placed in an ice-water bath, and

then 25 ml of DMF was added slowly. After the resulting mixture stirred at 4°C for 10 minutes, the water bath was removed and the stirring was continued for another 30 minutes. The yellowish mixture was gradually turned to light-gray clear solution, and then concentrated HCl was added dropwisely to quench excess NaBH<sub>4</sub>. After completion, the solution was extracted with dichloromethane and water. The collected dichloromethane fractions were dried over anhydrous MgSO<sub>4</sub>, filtered, and vacuum dried to give 0.44 g of light-yellow oil (53% yield). Elem Anal. Calcd (%) for C<sub>26</sub>H<sub>32</sub>N<sub>2</sub>S<sub>2</sub>: C 71.51; H 7.39 ; N 6.42. Found: C 71.50; H 7.39; N 6.06. <sup>1</sup>H NMR (CDCl<sub>3</sub>, 300K): δ 7.42 (dd, 2H, C<sub>6</sub>H<sub>4</sub>), 7.28 (t, 2H, C<sub>6</sub>H<sub>4</sub>), 7.07 (s, 1H, C<sub>6</sub>H<sub>1</sub>), 6.81 (dd, 2H, C<sub>6</sub>H<sub>4</sub>), 6.67 (t, 2H, C<sub>6</sub>H<sub>4</sub>), 4.24 (s, 4H, NCH<sub>2</sub>), 2.74 (m, 6H, CH<sub>2</sub>CH<sub>3</sub>), 1.26 (m, 9H, CH<sub>2</sub>CH<sub>3</sub>). <sup>13</sup>C NMR (CDCl<sub>3</sub>, 300K): δ 148.46, 144.09, 143.69, 135.31, 131.63, 129.64, 127.75, 117.19, 111.22, 110.31, 42.11, 26.12, 22.71, 17.19, 16.17.

### Synthesis of Hg<sub>2</sub>L<sub>2</sub>

To a stirring solution containing dithiol (0.27 g, 0.62 mmol) and NEt<sub>3</sub> (0.20 mL, 1.43 mmol) in dried CH<sub>3</sub>CN (15 mL), a CH<sub>3</sub>CN solution (15 mL) of Hg(NO<sub>3</sub>)<sub>2</sub> · H<sub>2</sub>O (0.13 g, 0.60 mmol) was added. After the resulting mixture stirred overnight at room temperature, the precipitated solid was collected using Celite 545 and re-dissolved using THF (20 mL). The collected THF solution was dried under vacuum to afford a light-yellow powder (0.26 g, 66%). Brick-like light-yellow crystals (Hg<sub>2</sub>L<sub>2</sub>·1.5dioxane) suitable for X-ray diffraction analysis were obtained by slow diffusion of pentane into THF/1,4-dioxane (v/v 4:1) solution of Hg<sub>2</sub>L<sub>2</sub> at 4°C. Elem Anal. Calcd (%) for C<sub>52</sub>H<sub>60</sub>Hg<sub>2</sub>N<sub>4</sub>S<sub>4</sub>: C 49.16; H 4.76; N 4.41. Found: C 49.18; H 4.62; N 4.08. <sup>1</sup>H NMR (CDCl<sub>3</sub>, 300K): δ 7.37 (d, *J* = 6.6 Hz, 2H, C<sub>6</sub>H<sub>4</sub>), 7.16 (t, *J* = 7.2 Hz, 2H, C<sub>6</sub>H<sub>4</sub>), 7.08 (s, 1H, C<sub>6</sub>H<sub>1</sub>), 6.83 (d, *J* = 7.8 Hz, 2H, C<sub>6</sub>H<sub>4</sub>), 6.67 (t, *J* = 7.2 Hz, 2H, C<sub>6</sub>H<sub>4</sub>), 4.32 (s, 2H, NH), 4.26 (s, 4H, NCH<sub>2</sub>), 2.68 (m, 6H, CH<sub>2</sub>CH<sub>3</sub>), 1.25 (m, 9H, CH<sub>2</sub>CH<sub>3</sub>). <sup>13</sup>C NMR (CDCl<sub>3</sub>, 300K): δ 148.19, 143.99, 143.57, 135.62, 131.67, 128.28, 127.58, 119.25, 117.92, 110.77, 41.94, 26.19, 23.22, 17.16, 16.10. HRMS (ESI) *m/z* calcd: 1271.3168. Found 1271.3151 ([M+H]<sup>+</sup>).

### Synthesis of Cd<sub>2</sub>L<sub>2</sub>

To a stirring solution containing dithiol (0.17 g, 0.39 mmol) and NEt<sub>3</sub> (0.12 mL, 0.86 mmol) in dried CH<sub>3</sub>CN (15 mL), a CH<sub>3</sub>CN solution (15 mL) of Cd(NO<sub>3</sub>)<sub>2</sub> · 4H<sub>2</sub>O (0.12 g, 0.39 mmol) was added. After the resulting mixture stirred overnight at room temperature, the precipitated solid was collected using Celite 545 and re-dissolved using DMSO (40 mL). The collected DMSO solution was dried under vacuum to afford a light-yellow powder (0.16 g, 75%). Elem Anal. Calcd (%) for C<sub>52</sub>H<sub>60</sub>N<sub>4</sub>S<sub>4</sub>Cd<sub>2</sub>: C 57.08; H 5.53; N 5.12. Found: C 57.14; H 5.32; N 5.01. <sup>1</sup>H NMR (DMSO-d<sub>6</sub>, 300K): δ 7.19 (d, 2H, C<sub>6</sub>H<sub>4</sub>), 6.98 (s, 1H, C<sub>6</sub>H<sub>1</sub>), 6.90 (t, 2H, C<sub>6</sub>H<sub>4</sub>), 6.59 (d, 2H, C<sub>6</sub>H<sub>4</sub>), 6.37 (t, 2H, C<sub>6</sub>H<sub>4</sub>), 4.84 (s, 2H, NH), 4.10 (s, 4H, NCH<sub>2</sub>), 2.68 (m, 6H, CH<sub>2</sub>CH<sub>3</sub>), 1.23 (m, 9H, CH<sub>2</sub>CH<sub>3</sub>). <sup>13</sup>C NMR (DMSO-d<sub>6</sub>, 300K): δ 148.67, 143.44, 142.72, 134.48, 132.78, 127.08, 125.66, 124.32, 116.01, 108.72, 42.16, 25.88, 22.05, 17.02, 16.33. HRMS (ESI) *m/z* calcd: 1097.1853. Found: 1097.1841 ([M+H]<sup>+</sup>).

### Synthesis of (ZnL)<sub>10</sub>

To a stirring solution containing dithiol (0.17 g, 0.39 mmol) and NEt<sub>3</sub> (0.12 mL, 0.86 mmol) in dried CH<sub>3</sub>CN (15 mL), a CH<sub>3</sub>CN solution (15 mL) of ZnCl<sub>2</sub> (0.05 g, 0.39 mmol) was added. After the resulting mixture stirred overnight at room temperature, the precipitated solid was collected using Celite 545 and re-dissolved using CHCl<sub>3</sub> (20 mL). The collected CHCl<sub>3</sub> solution was dried under vacuum to afford a light-yellow powder (0.18 g, 92.5%). Brick-like light-yellow crystals suitable for X-ray diffraction analysis were obtained by slow diffusion of hexane into CHCl<sub>3</sub> solution of (ZnL)<sub>10</sub> at 4°C. Elem Anal. Calcd (%) for C<sub>260</sub>H<sub>300</sub>N<sub>20</sub>S<sub>20</sub>Zn<sub>10</sub>: C 62.45; H 6.05; N 5.60. Found: C 62.19; H 6.32; N 5.81. <sup>1</sup>H NMR (CDCl<sub>3</sub>, 300K): δ 7.86 (d, *J* = 6.6 Hz, 1H, C<sub>6</sub>H<sub>4</sub>), 7.72 (d, *J* = 7.2 Hz, 1H, C<sub>6</sub>H<sub>4</sub>), 7.40 (m, 2H, C<sub>6</sub>H<sub>4</sub>), 6.66 (s, 1H, C<sub>6</sub>H<sub>1</sub>), 6.20 (t, *J* = 7.2 Hz, 1H, C<sub>6</sub>H<sub>4</sub>), 5.94 (d, *J* = 10.5 Hz, 1H, NH), 5.86 (m, 2H, C<sub>6</sub>H<sub>4</sub>), 5.67 (d, *J* = 11.4 Hz, 1H, NH), 5.17 (d, *J* = 7.5 Hz, 1H, C<sub>6</sub>H<sub>4</sub>), 4.81 (d, *J* = 14.1 Hz, 1H, NCH<sub>2</sub>), δ 4.30 (t, *J* = 12.3 Hz, 1H, NCH<sub>2</sub>), 3.93 (d, *J* = 11.4 Hz, 1H, NCH<sub>2</sub>), 3.63 (t, *J* = 12.3 Hz, 1H, NCH<sub>2</sub>), 3.00 (m, 3H, CH<sub>2</sub>CH<sub>3</sub>), 1.59 (m, 1H, CH<sub>2</sub>CH<sub>3</sub>), 1.50 (m, 1H, CH<sub>2</sub>CH<sub>3</sub>), 1.37 (m, 1H, CH<sub>2</sub>CH<sub>3</sub>), 1.10 (t, *J* = 7.2 Hz, 3H, CH<sub>2</sub>CH<sub>3</sub>), 0.80 (m, 6H, CH<sub>2</sub>CH<sub>3</sub>). <sup>13</sup>C NMR (CDCl<sub>3</sub>, 300K): δ 145.56, 143.82, 143.15, 142.34, 141.38, 140.31, 138.71, 133.77, 132.15, 130.17, 130.01, 128.41, 127.99, 125.85, 125.55, 125.14, 124.74, 121.65, 52.00, 48.93, 26.25, 24.77, 24.19, 18.12, 15.54, 13.54.

### The studies of fluorescence, absorption and <sup>1</sup>H NMR titrations of (ZnL)<sub>10</sub>

The salts possessing different anions including Bu<sub>4</sub>NCl, Bu<sub>4</sub>NBr, Bu<sub>4</sub>NI, Bu<sub>4</sub>NCIO<sub>4</sub>, Bu<sub>4</sub>NPF<sub>6</sub>, Bu<sub>4</sub>NNO<sub>3</sub>, Bu<sub>4</sub>NHSO<sub>4</sub>, and Bu<sub>4</sub>NH<sub>2</sub>PO<sub>4</sub> were used for the studies of titrations. The fluorescent titrations were performed by incubating 10 μM (ZnL)<sub>10</sub> at ambient conditions with varying concentrations of different anions for 10 mins in CHCl<sub>3</sub>. The decomposition of (ZnL)<sub>10</sub> was monitored by fluorescence spectroscopy (excitation wavelength at 265 nm). For absorption and NMR titrations of (ZnL)<sub>10</sub> with H<sub>2</sub>PO<sub>4</sub><sup>-</sup> anions, the procedures used were the same as that used for fluorescence titration. In the case of NMR titrations, 0.1 mM (ZnL)<sub>10</sub> and CDCl<sub>3</sub> solvent were used instead.

**Fig. S1** Partial  $^1\text{H}$  NMR spectra of Zn complex (a), Cd complex (b), Hg complex (c), and  $\text{H}_2\text{L}$  ligand (d). All spectra were obtained from  $\text{CDCl}_3$  (\*) solution, except the spectrum of Cd complex (in  $\text{DMSO-d}_6$ ).

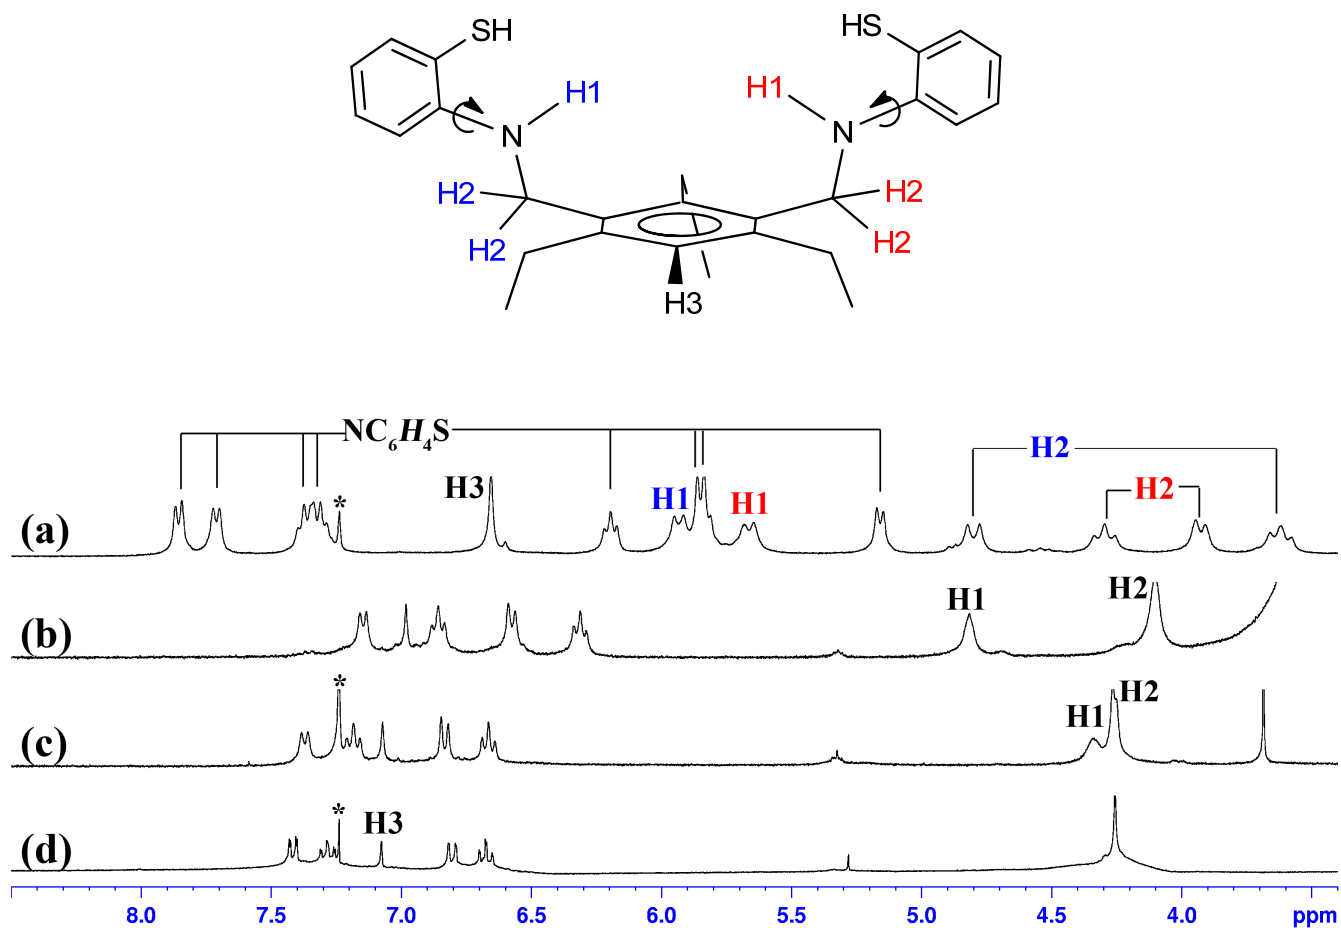

**Fig. S2** Ortep drawing of dinuclear complex  $\text{Hg}_2\text{L}_2$  at 50% probability. All hydrogen atoms and one dioxane molecule outside the complex are omitted for clarity.

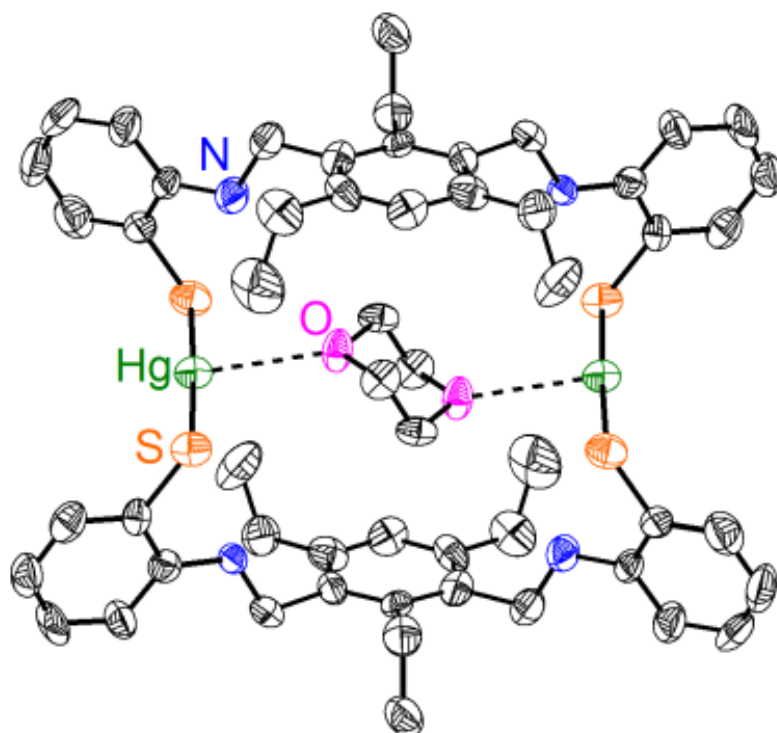

**Fig. S3**  $^1\text{H}$  NMR spectrum ( $\text{CDCl}_3$ , 300K) of  $(\text{ZnL})_{10}$

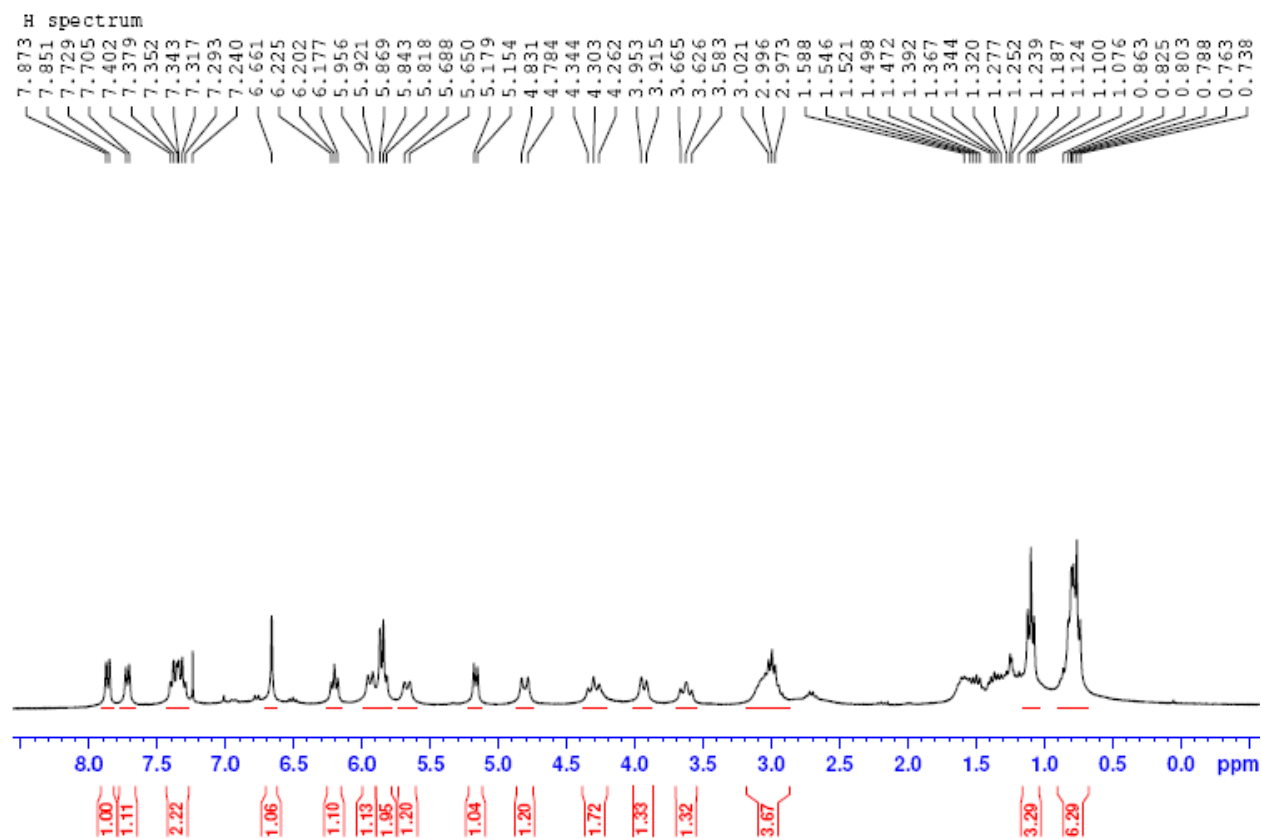

**Figure S4.**  $^{13}\text{C}$  NMR spectrum ( $\text{CDCl}_3$ , 300K) of  $(\text{ZnL})_{10}$

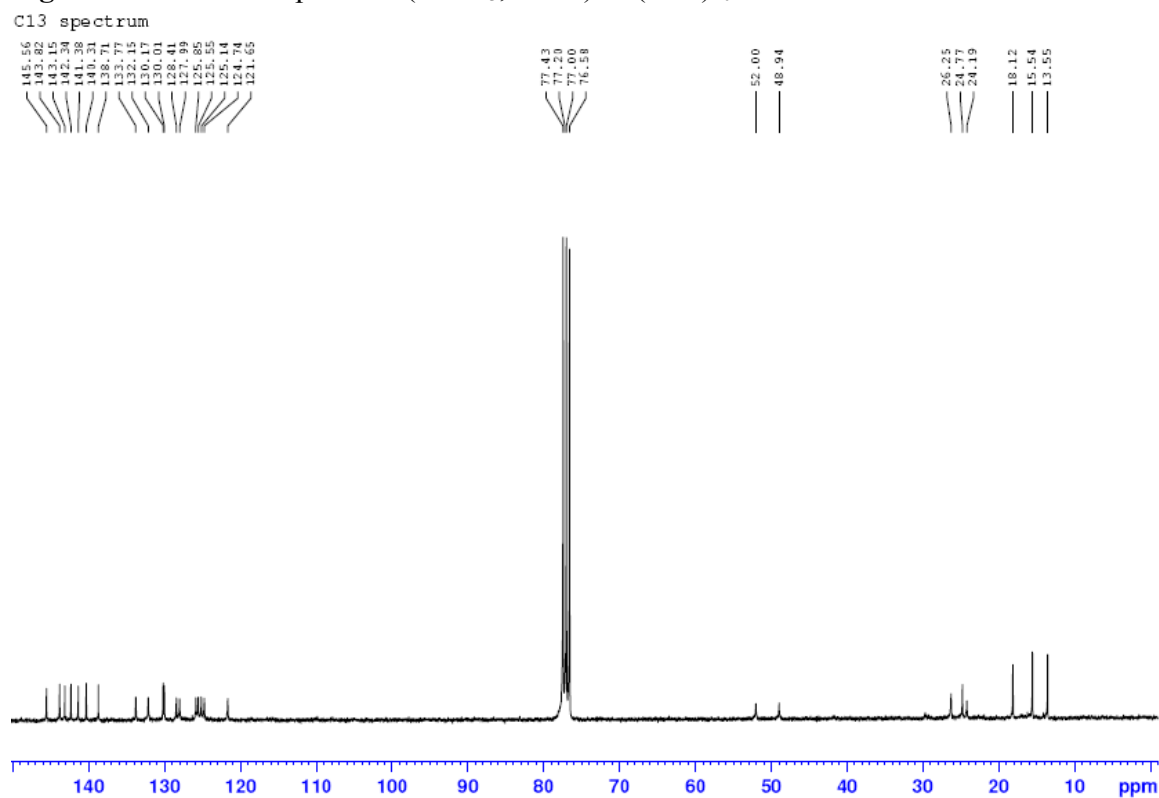

**Fig. S5**  $^1\text{H} - ^1\text{H}$  COSY NMR spectra ( $\text{CDCl}_3$ , 300K) of  $(\text{ZnL})_{10}$ .

COSY spectrum

(a)

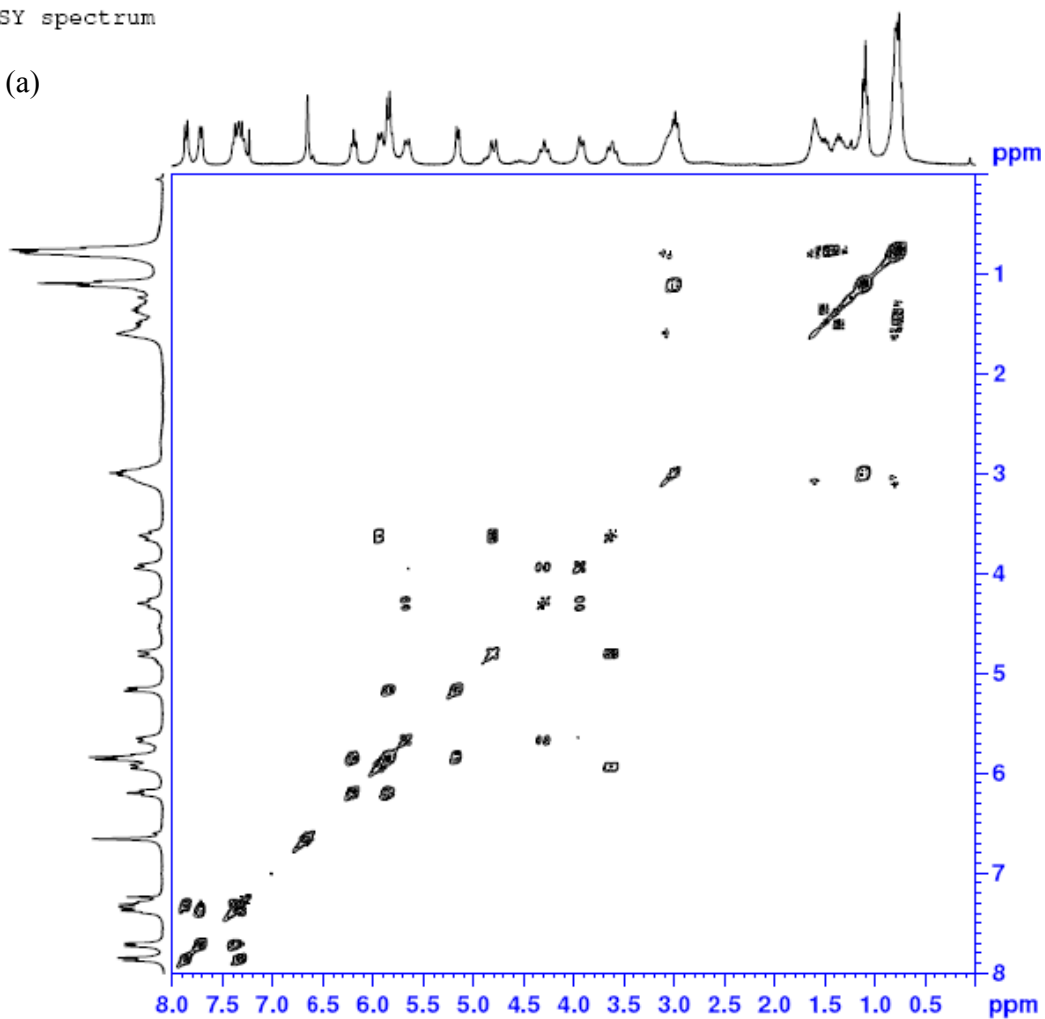

COSY spectrum

(b)

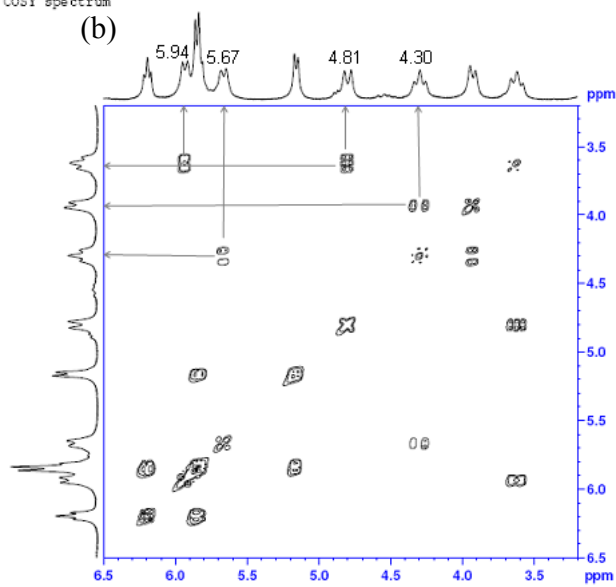

COSY spectrum

(c)

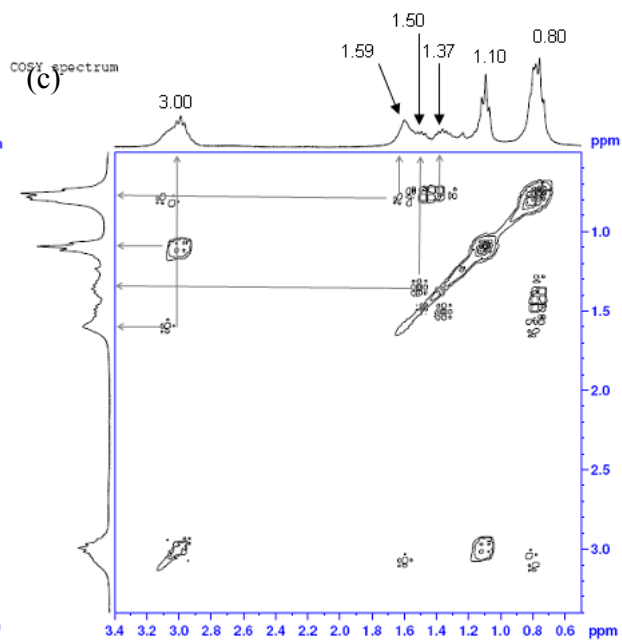

**Fig. S6**  $^1\text{H} - ^{13}\text{C}$  HSQC NMR spectra ( $\text{CDCl}_3$ , 300K) of  $(\text{ZnL})_{10}$ .

HSQC spectrum

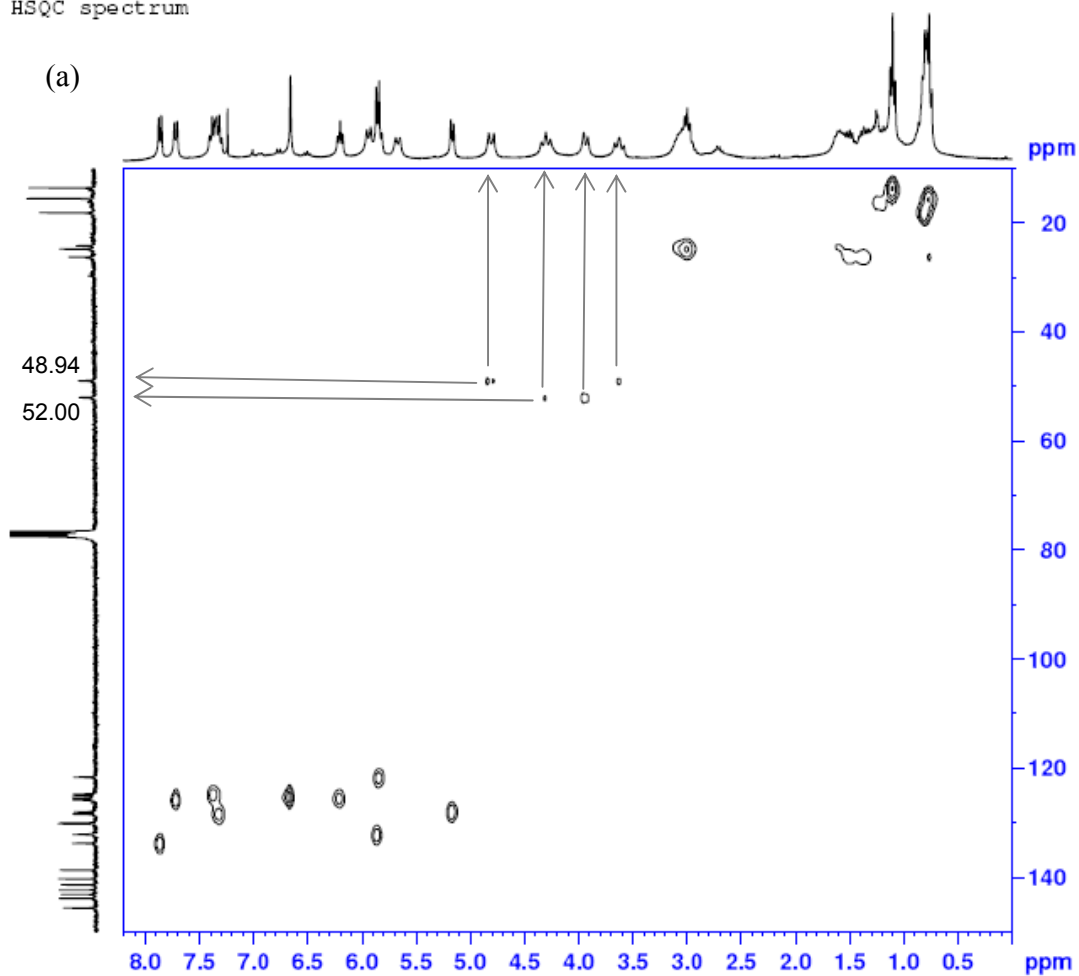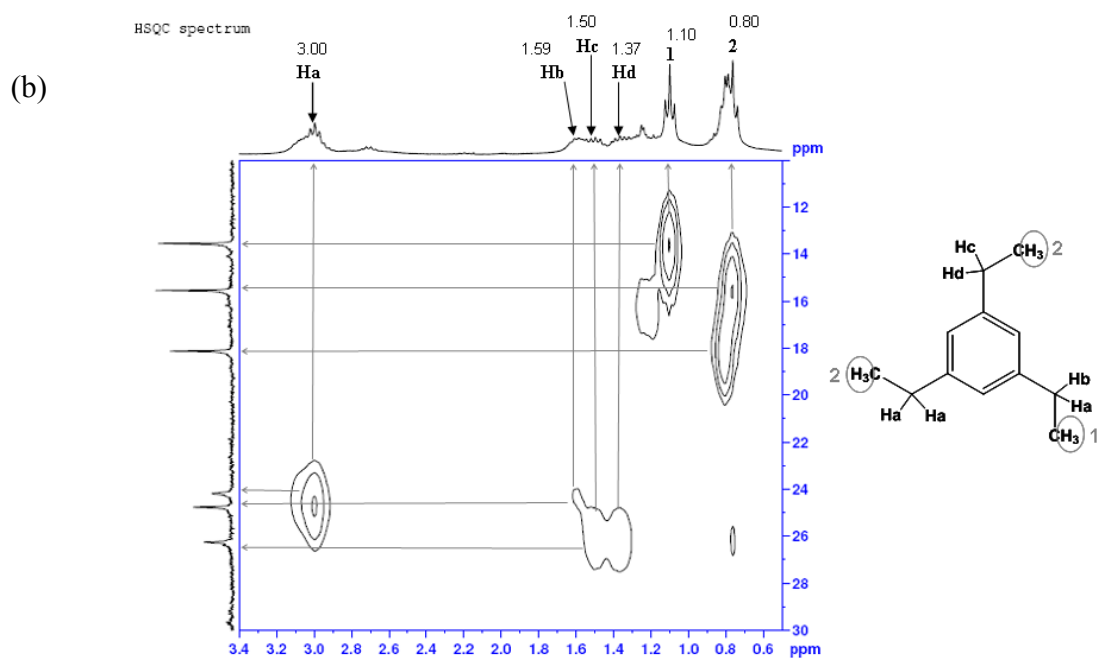



**Fig. S7** The end-on view of the bond between the vicinal N(3) and C(31) atoms from the crystal structure of  $(ZnL)_{10}$ . The dihedral angles of  $79.76^\circ$  and  $161.91^\circ$  between vicinal protons are predicted to have coupling constants of 9 Hz and near zero Hz, respectively, from the vicinal Karplus correlation diagram.<sup>3</sup> The calculated coupling constants match well with those from the experimental observation. This explains why H(31A) and H(31B) belonging to the same methylene carbon (C(31)) have triplet and doublet signals, respectively, from  $^1H$  NMR spectrum of  $(ZnL)_{10}$ .

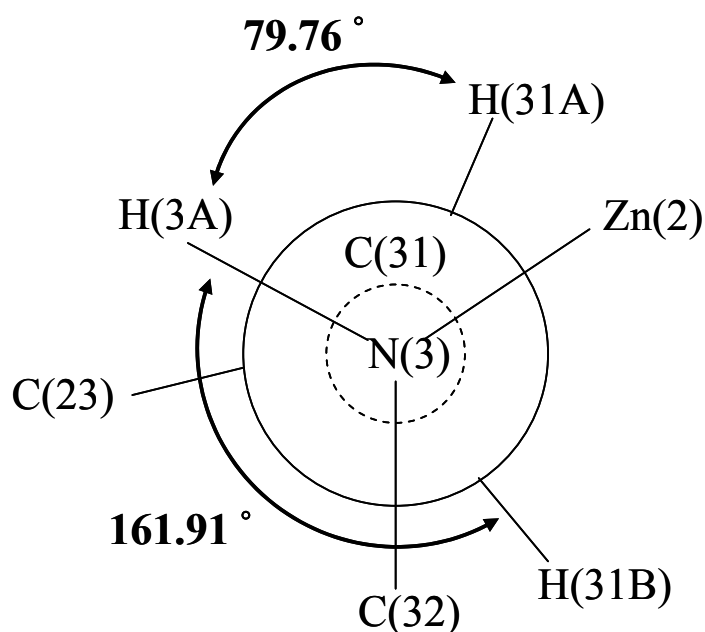

**Fig. S8** Space-filling model of the molecular structure of  $(ZnL)_{10}$ : top view (left); side view (right). The same color representation of ligands as described in Fig. 2. Zn in violet, H in white.

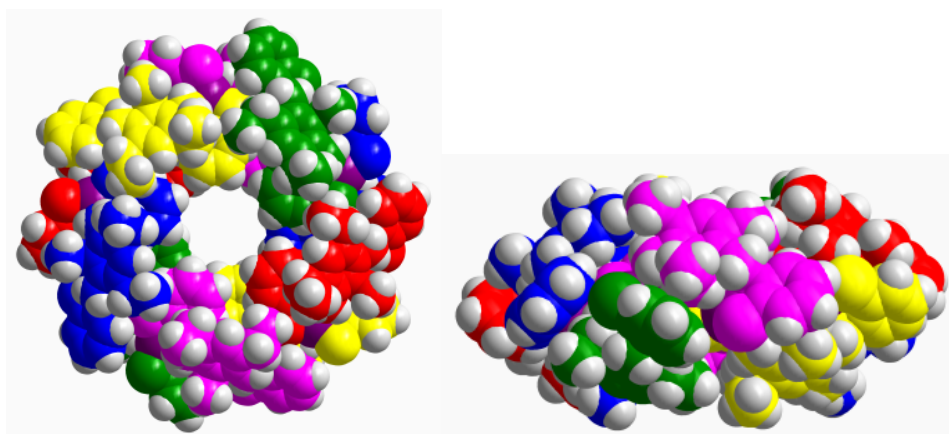

**Fig. S9** (a) Packing diagram of the circular helicate showing the C-H $\cdots$  $\pi$  interactions. All ethyl groups and hydrogen atoms are omitted for clarity except C55, C56, H96B and H56B atoms. H56B $\cdots$ X = 2.7205(1) Å (X = centroid of C19, C20, C21, C22, C23, C24); H96B $\cdots$ C92 = 2.595(8) Å; H96B $\cdots$ C93 = 2.72(1) Å. Each helicate is shown in a different color. (b) Space-filling picture of 3D packing of the circular helicate. Each helicate is shown in a different color.

(a)

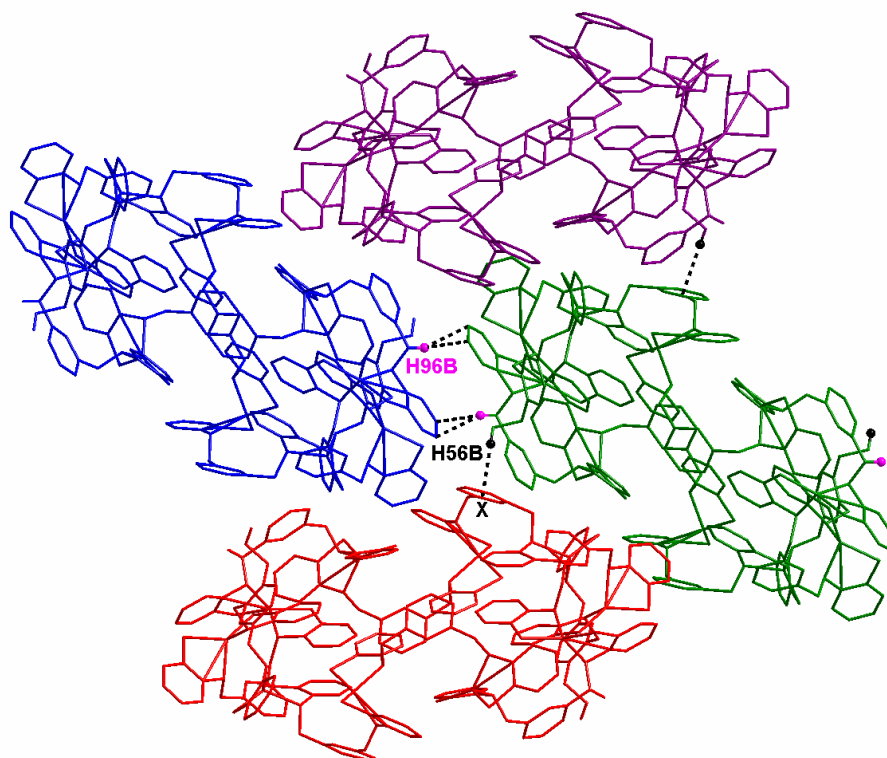

(b)

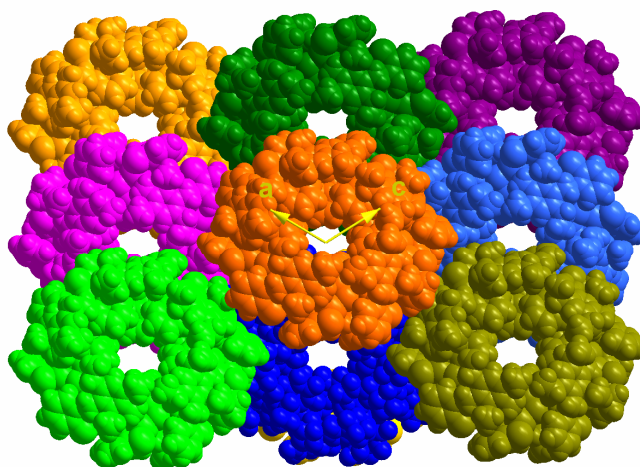

**Fig. S10**  $^1\text{H}$  NMR titration of  $(\text{ZnL})_{10}$  with  $\text{H}_2\text{PO}_4^-$  anions. (a)  $(\text{ZnL})_{10}$  + 2 equiv.  $\text{H}_2\text{PO}_4^-$ ; (b)  $(\text{ZnL})_{10}$  + 4 equiv.  $\text{H}_2\text{PO}_4^-$ ; (c)  $(\text{ZnL})_{10}$  + 7 equiv.  $\text{H}_2\text{PO}_4^-$ ; (d)  $(\text{ZnL})_{10}$  + 10 equiv.  $\text{H}_2\text{PO}_4^-$ ; (e)  $(\text{ZnL})_{10}$  + 13 equiv.  $\text{H}_2\text{PO}_4^-$ ; (f) purified  $\text{H}_2\text{L}$ .

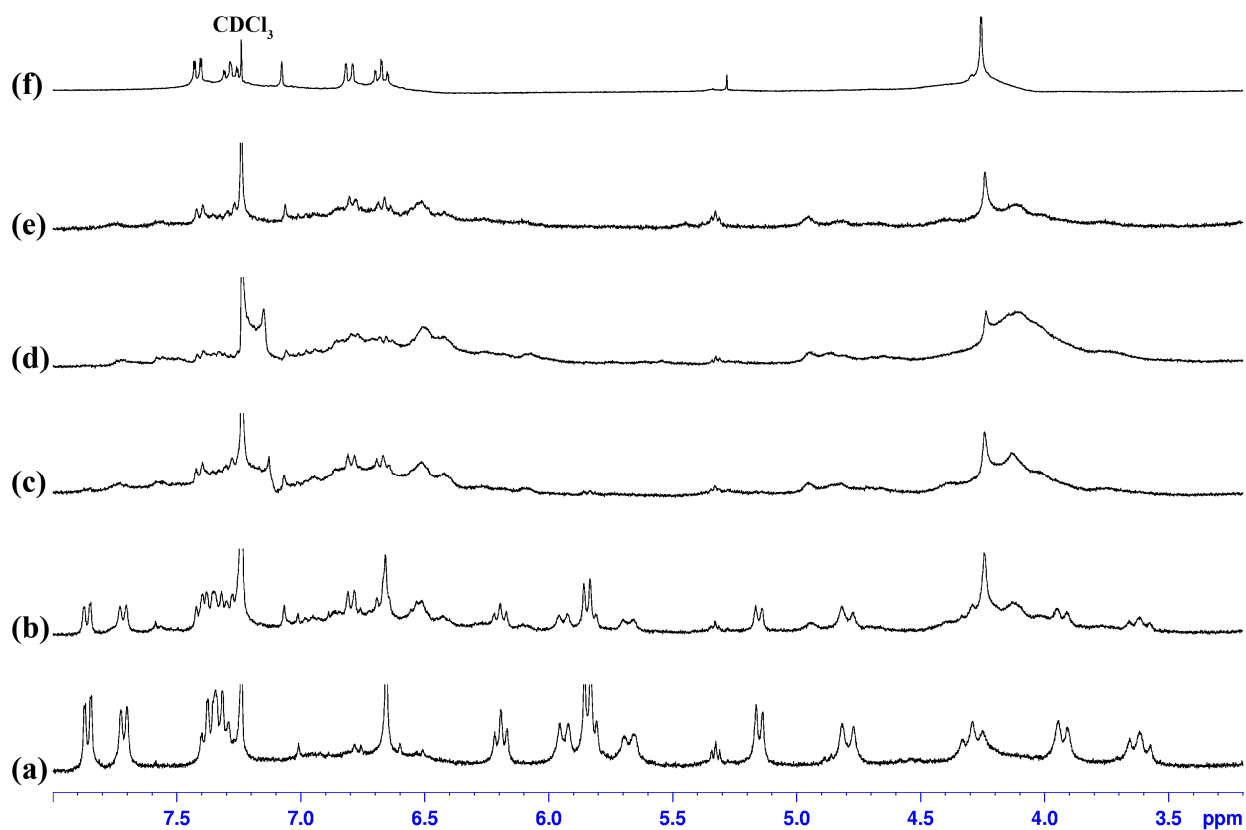

## Reference

1. G. M. Sheldrick, *SHELXTL, Version 5.1*. Bruker AXS Inc., Madison, WI, 1998.
2. L. E. Sutton, *Tables of Interatomic Distances and Configurations in Molecules and Ions*, Chemical Society Publications, UK, 1965.
3. P. van der Sluis, A. L. Spek, *Acta Cryst.* 1990, **A46**, 194-201.
4. M. Karplus, *J. Chem. Phys.*, 1959, **30**, 11-15.
